# Supplementary material for: Reproducibility and Repeatability of Computer Tomography-based Measurement of Abdominal Subcutaneous and Visceral Adipose Tissues
Source: PubMed Central journal article supplement (PMC5223165; doi:10.1038/srep40389), 2017-01-10
Supplement: srep40389-s1.pdf [file srep40389-s1.pdf]

**Reproducibility and Repeatability of Computer Tomography-based Measurement of Abdominal Subcutaneous and Visceral Adipose Tissues**

*Yuan-Hao Lee, Hsing-Fen Hsiao, Hou-Ting Yang, Shih-Yi Huang, Wing P. Chan*

**Supplemental Table 1: Age and BMI characteristics of the participants for assessment of intra-rater agreement.**

| Sex    | Subjects<br>(n=20) | Age (years) |       | BMI (kg/m <sup>2</sup> ) |           | Number of subjects  |                          |                      |
|--------|--------------------|-------------|-------|--------------------------|-----------|---------------------|--------------------------|----------------------|
|        |                    | Mean        | Range | Mean                     | Range     | BMI < 25<br>(n = 2) | 25 ≤ BMI < 30<br>(n = 8) | BMI ≥ 30<br>(n = 10) |
| Male   | 5                  | 45          | 27–66 | 34.2                     | 28.9-41.2 | 0                   | 1                        | 4                    |
| Female | 15                 | 45          | 24-63 | 30.0                     | 23.5–38.1 | 2                   | 7                        | 6                    |

BMI: body mass index

n: number of participants
